# Supplementary material for: Altered Gene Response to Aflatoxin B1 in the Spleens of Susceptible and Resistant Turkeys
Source: MDPI journal article supplement (doi:10.3390/toxins11050242), 2019-04-28

Figure S1: Distribution of expressed genes in turkey spleen by treatment group. Number and percent of genes are included. Genes were considered expressed in a treatment group if the by-total normalized read count  $\geq 3.0$  in any individual within the group. EW CNTL = Eastern wild control, DT CNTL = domesticated control, EW AFB = Eastern wild aflatoxin B<sub>1</sub>-treatment and DT AFB = domesticated aflatoxin B<sub>1</sub>-treatment.

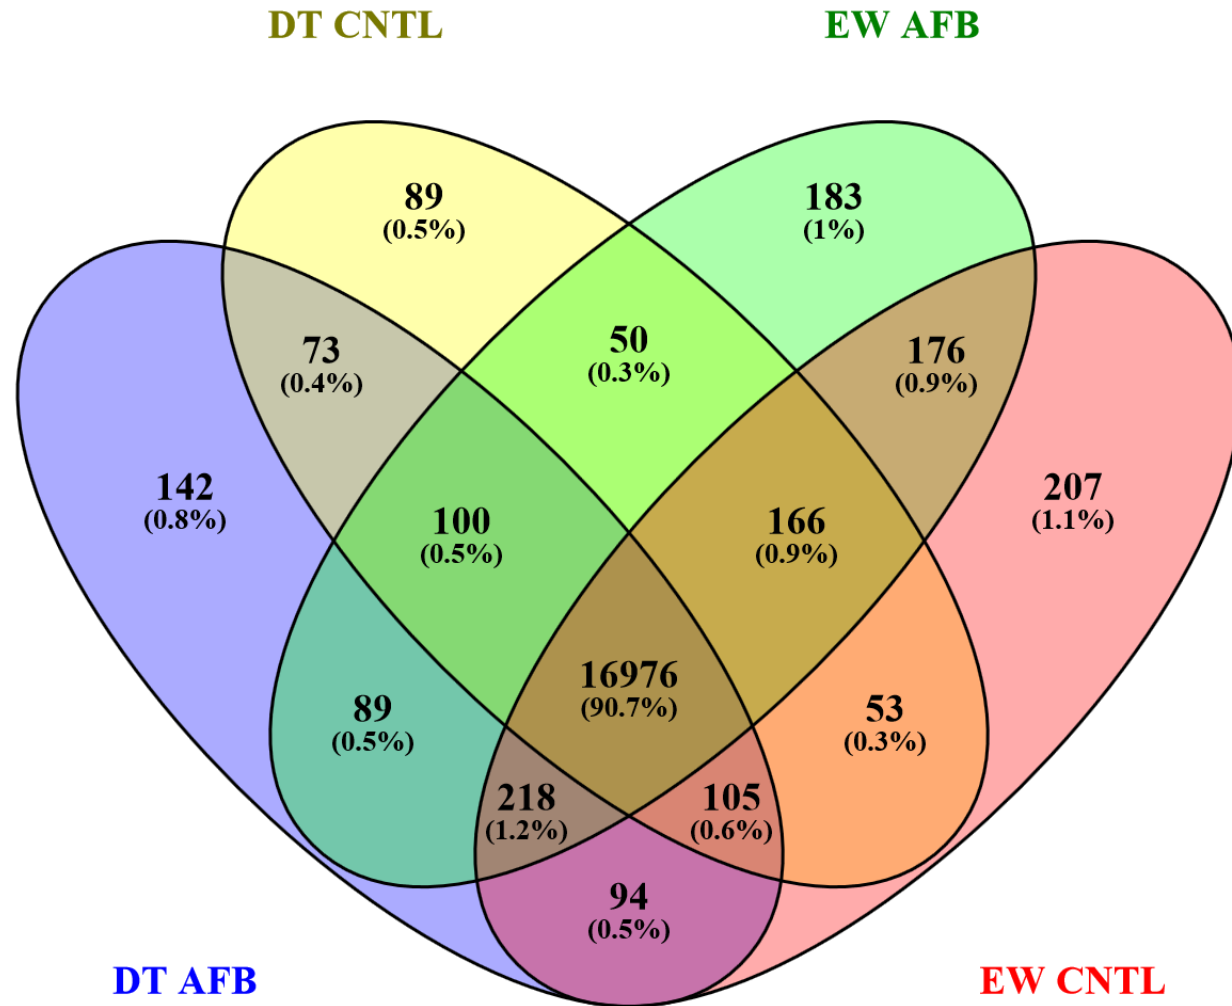

Figure S2: Summary of principal component analysis (PCA) of by-total normalized RNAseq read counts. Sample to sample distances are illustrated on the first two principal components.

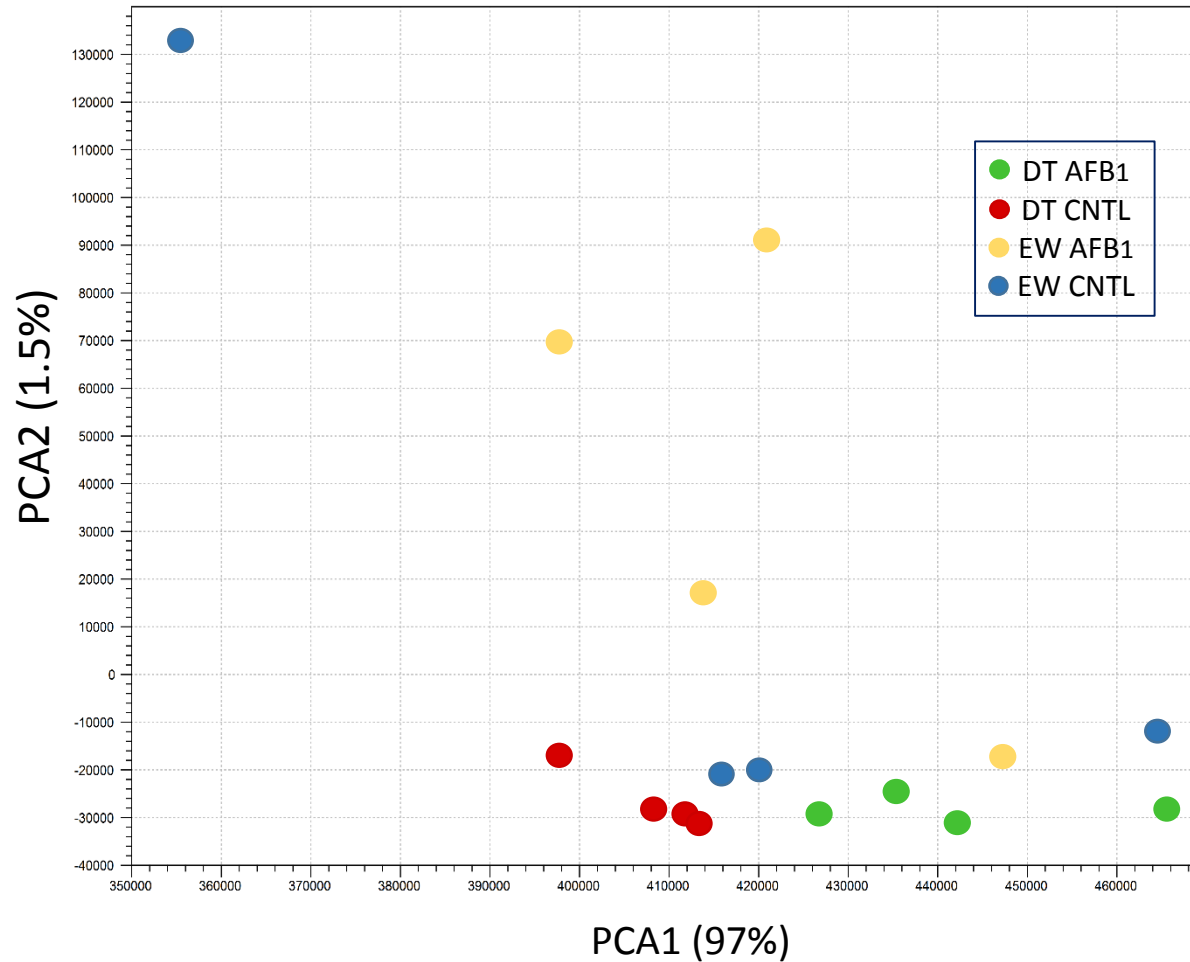

Figure S3: Effect of AFB<sub>1</sub> on expression of turkey genes in the IPA canonical pathway “acute phase signaling”. Genes with significantly higher expression in EW birds compared to DT following AFB<sub>1</sub> treatment are indicated in red.

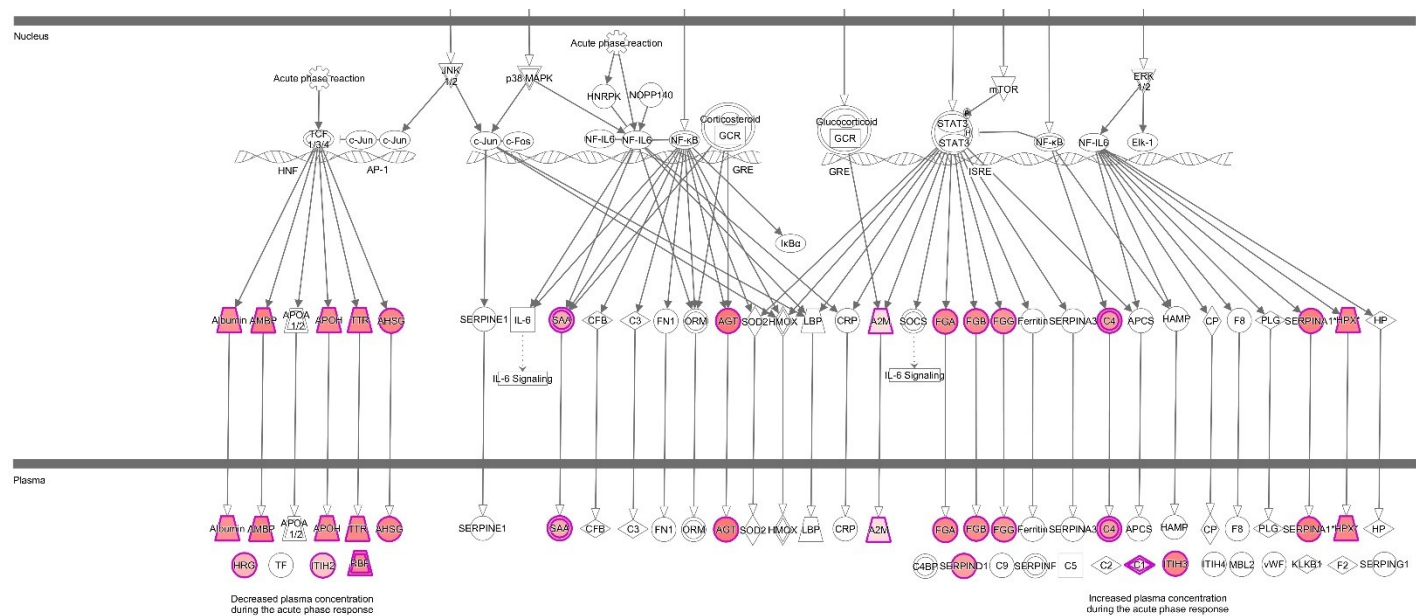

Supplement: s1 [file s1]
